# Supplementary material
Source: HighWire-hosted journal article supplement (https://www.jrheum.org/highwire/filestream/35433/field_highwire_adjunct_files/0/180147DataSuppl.pdf)
Supplement: 180147DataSuppl.pdf [file 180147DataSuppl.pdf]

**Supplementary Table 1.** Prevalence of arthritis in Canada by age and sex comparing 2007/8 and 2015

| Prevalence and number of arthritis in Canada by age and sex |           |           |              |                |           |              |
|-------------------------------------------------------------|-----------|-----------|--------------|----------------|-----------|--------------|
| Age groups                                                  | CCHS 2015 |           |              | PHAC 2007-2008 |           |              |
|                                                             | Men (%)   | Women (%) | Total Number | Men (%)        | Women (%) | Total Number |
| 15-19                                                       | 0.8       | 1.2       | 20500        | 0.7            | 0.8       | 15476        |
| 20-24                                                       | 1.6       | 2.1       | 40925        | 1.7            | 2.0       | 40301        |
| 25-29                                                       | 2.8       | 3.9       | 77260        | 2.4            | 3.4       | 65772        |
| 30-34                                                       | 3.5       | 5.7       | 122040       | 2.7            | 4.8       | 81570        |
| 35-39                                                       | 8.3       | 6.5       | 163640       | 5.6            | 6.8       | 141762       |
| 40-44                                                       | 12.4      | 13.3      | 301820       | 8.4            | 10.1      | 235798       |
| 45-49                                                       | 15.6      | 18.1      | 414280       | 10.5           | 15.6      | 341549       |
| 50-54                                                       | 18.0      | 24.0      | 555785       | 16.8           | 21.6      | 471367       |
| 55-59                                                       | 25.1      | 35.7      | 769690       | 19.5           | 30.1      | 537992       |
| 60-64                                                       | 31.9      | 43.9      | 853245       | 25.4           | 37.5      | 534737       |
| 65-69                                                       | 36.0      | 48.4      | 845120       | 28.6           | 43.7      | 478442       |
| 70-74                                                       | 36.9      | 56.2      | 664800       | 33.2           | 47.0      | 431613       |
| 75-79                                                       | 46.4      | 62.8      | 512255       | 35.4           | 54.7      | 401337       |
| 80-84                                                       | 42.8      | 60.9      | 329780       | 41.6           | 55.3      | 287528       |
| 85+                                                         | 39.3      | 64.3      | 285905       | 45.2           | 61.0      | 287528       |
| All Ages                                                    | 16.8      | 23.9      | 5957045      | 12.6           | 19.2      | 194450       |

**Supplementary Table 2.** Current (2015 and 2016) prevalence and number of people with arthritis by age  $\geq 15$  and sex, Canada

|       | 2015           |                |                | 2016           |                |                |
|-------|----------------|----------------|----------------|----------------|----------------|----------------|
|       | Total          | Men            | Women          | Total          | Men            | Women          |
|       | Prevalence (%) | Prevalence (%) | Prevalence (%) | Prevalence (%) | Prevalence (%) | Prevalence (%) |
|       | Number ('000s) | Number ('000s) | Number ('000s) | Number ('000s) | Number ('000s) | Number ('000s) |
| 15-24 | 1.4            | 1.2            | 1.7            | 2.0            | 1.9            | 2.0            |
|       | 62             | 28             | 34             | 81             | 41             | 41             |
| 25-34 | 4.0            | 3.2            | 4.9            | 3.7            | 2.7            | 4.7            |
|       | 199            | 76             | 124            | 190            | 71             | 120            |
| 35-44 | 10.2           | 10.4           | 10.0           | 10.1           | 10.1           | 10.0           |
|       | 466            | 242            | 223            | 453            | 225            | 229            |
| 45-54 | 19.0           | 16.9           | 21.1           | 20.3           | 17.8           | 22.8           |
|       | 970            | 420            | 551            | 1,031          | 453            | 579            |
| 55-64 | 34.0           | 28.3           | 39.5           | 33.6           | 29.4           | 37.9           |
|       | 1,623          | 669            | 954            | 1,668          | 727            | 942            |
| 65-74 | 44.5           | 36.4           | 51.7           | 42.7           | 34.9           | 50.1           |
|       | 1,510          | 579            | 931            | 1,506          | 597            | 910            |
| 75-84 | 54.0           | 44.9           | 62.1           | 52.7           | 42.6           | 60.7           |
|       | 842            | 328            | 514            | 869            | 312            | 557            |
| 85+   | 54.9           | 39.3           | 64.3           | 56.6           | 52.6           | 58.8           |
|       | 286            | 77             | 209            | 282            | 92             | 191            |

**Supplementary Table 3.** Projected prevalence of arthritis (age  $\geq 15$ ), Canada

|       | 2020           |                | 2025           |                | 2030           |                | 2035           |                | 2040           |                |
|-------|----------------|----------------|----------------|----------------|----------------|----------------|----------------|----------------|----------------|----------------|
|       | Prevalence (%) | Number ('000s) | Prevalence (%) | Number ('000s) | Prevalence (%) | Number ('000s) | Prevalence (%) | Number ('000s) | Prevalence (%) | Number ('000s) |
| Total | 21.7           | 6,829          | 22.6           | 7,448          | 23.3           | 8,018          | 23.8           | 8,565          | 24.1           | 8,980          |
| Men   | 17.8           | 2,756          | 18.5           | 3,011          | 19.1           | 3,237          | 19.4           | 3,437          | 19.6           | 3,607          |
| Women | 25.5           | 4,073          | 26.5           | 4,437          | 27.4           | 4,781          | 28.1           | 5,129          | 28.4           | 5,373          |
